# Supplementary material for: Localization of the Carnation Italian ringspot virus replication protein p36 to the mitochondrial outer membrane is mediated by an internal targeting signal and the TOM complex
Source: Springer Nature journal article supplement (doi:10.1186/1471-2121-9-54), 2008-09-23
Supplement: Additional file 4 [file 1471-2121-9-54-s4.pdf]

## Additional file 4 – List of synthetic oligonucleotide primers used in the construction of plasmids.

| <u>Plasmid</u>                           | <u>Primers</u>                       | <u>Sequence (5' to 3')</u>                                                                                                                                                                                                                                                            |
|------------------------------------------|--------------------------------------|---------------------------------------------------------------------------------------------------------------------------------------------------------------------------------------------------------------------------------------------------------------------------------------|
| pRTL2/p36                                | Fp135<br>Rp107<br>Fp447<br>Rp448     | GGCGGGCCATGGAGGGTTTGAAGGCTGAGTCTACCACAACCTGTGGG<br>GGTAGACGCACTAGGCCCGGGTTTGACACCGAGGGATTCC<br>GGAATCCCTCGGTGTCAAATAGCCCGGGGATCCTTAGAGTCC<br>GGACTCTAGAGGATCCCGGGCTATTGACACCGAGGGATTCC                                                                                                |
| pRTL2/p36-myc                            | Fp177<br>Rp178                       | CCGGCGAACAAAAGTTGATTCTGAAGAAGATTTGTAGAGATCTC<br>CCGGGAGAATCTCTACAAATCTTCTCAGAAATCAACTTTTGTTCG                                                                                                                                                                                         |
| pRTL2/myc-p36                            | Fp29<br>Rp30                         | CATGGAACAAAAGTTGATTCTGAAGAAGATTTGGG<br>CATGCCGGCGTAGTCTGGCACGTCGTATGGGTACCC                                                                                                                                                                                                           |
| pRTL/Rep                                 | Fp135<br>Rp572                       | GGCGGGCCATGGAGGGTTTGAAGGCTGAGTCTACCACAACCTGTGGG<br>CCCGCGCCCGGTCAAGCTACGGCGGAGTCGAGGATGCTGGGC                                                                                                                                                                                         |
| pRTL2/p95                                | Fp642<br>Rp641                       | GGAATCCCTCGGTGTCAAATATGGAGCCTAGTGCCTTACC<br>GGTAGACGCACTAGGCCTCCATATTTGACACCGAGGGATTCC                                                                                                                                                                                                |
| pHST/CIRV                                | Fp646<br>Rp645<br>Fp735<br>Rp734     | GGAAGTTCATTTTCATTTGGAGAGCCCTATTCTCCAGGATTCCTCGACC<br>GGTCGAGGAATCCTGGAGAATAGGCCTCTCCAAATGAAATGAACTTCC<br>GGCGGCAGGCCTAGGAAATATCTCAGGATTTGACCGTCCGGTGAGTTGCG<br>GCCCGCAGCACAAATAGGAACAAGTGTGCAGCCG                                                                                     |
| pRTL2/p36-myc ( <i>MluI</i> )            | Fp275<br>Rp276                       | CCCGCGATTGTGGCAAACACGCGTATTGTTACTGGTACATGTGAGG<br>CCTCACATGTACCAGTAACAATACGCGTGTGGCCACAATCGCCGGG                                                                                                                                                                                      |
| pRTL2/p36-myc ( <i>MluI/AvrII</i> )      | Fp277<br>Rp278                       | GGCATTGCGTACGCTACCCTCCCTAGGGAAAACTGTCTGTGTTTAGG<br>GGCATTGCGTACGCTACCCTCCCTAGGGAAAACTGTCTGTGTTTAGG                                                                                                                                                                                    |
| pRTL2/p36- <i>AvrII</i>                  | Fp340<br>Rp341                       | CCTCGGTGTCAAACCTAGGGCCTAGTGC<br>GCACTAGGCCCTAGGTTTGACACCGAGG                                                                                                                                                                                                                          |
| pRTL2/p36 120-190-CAT                    | Fp331<br>Rp332                       | CCCGCGATTGTGGCAAACCCATGGATTGTTACTGGTACATGTGAGG<br>CCTCACATGTACCAGTAACAATCCATGGGTTTGGCCACAATCGCCGGG                                                                                                                                                                                    |
| pRTL2/p36 120-164-CAT                    | Fp407<br>Rp408                       | CCACGTGTAGACATGAGTGCCTGAGAAAAAATCACTGGATATACC<br>GGTATATCCAGTGATTTTTTTCTCACGCGCACTCATGTCTACACGTGG                                                                                                                                                                                     |
| pRTL2/p36 90-164-CAT                     | Fp449<br>Rp452                       | CGGGCCATGGATTGGTTGGCTAACCGGGTGTGGCTCGTATTACCGC<br>CCCCCCCCTAGGACGCGCACTCATGTCTACACGTGGATAAAAAGTACGG                                                                                                                                                                                   |
| pRTL2/p36 90-190-CAT                     | Fp457<br>Rp453-2                     | CCCGCCCCTAGGCTGGGGAGGGTAGCGTACGCAATGCC<br>GGGCCCGGATCCACACGCAATTGTTACTGTGTACATGTGAGGTGGCAGGGG                                                                                                                                                                                         |
| pUC18/p36 90-190-mGFP                    | Fp1623<br>Rp1624<br>Fp1255<br>Rp1256 | GGGGCCCATGGATTGGTTGGCTAACCGGGTGTGGC<br>GGGGGGCCATGGGCTGGGAGGGTAGCGTACGCAATGCC<br>CGATCACATGGTCTTAAGGAGTTCGTGACCCGC<br>GGCGGTACGAACCTCTTAAGGACCATGTGATCG                                                                                                                               |
| pRTL2/p33-myc ( <i>MluI</i> )            | Fp273<br>Rp274                       | CCGCTGTTGAGTTATGCCACGCGTGTACGCGCAGTCTCAGTCAAGG<br>CCTTGACTGAGACTGCGCGTACACGCGTGGCATAACTCAACAGCGG                                                                                                                                                                                      |
| pRTL2/p33 103-131 p36-myc                | Fp1983<br>Rp1984<br>Fp2007<br>Rp2008 | CGCGTGTACGCGCAGTCTCAGTCAAGGCTTTTGGCAATGAACATATCGTT<br>CAATGTCAGGGTGGCTAGACCATCTGTACCTAAGAAAG<br>TCGACTTTCTTAGGTACAGATGGTCTAGGCACCCCTGACATTGAACGATA<br>GTTCAATGCCAAAAGCCTTGACTGAGACTGCGCGTACA<br>GACCATCTGTACTAAGAAAGGCATGCTCATTTGGCCTGGCG<br>CGCCAGGCAATGAGCATGCCTTTCTTAGGTACAGATGGTC |
| pRTL2/p36-myc ( <i>MluI/SalI/AvrII</i> ) | Fp576<br>Rp575                       | CGTACTTTTATCCACGTGTGACATGAGTGCCTGGCATGC<br>GCATGCCACGCGCACTCATGTGACACGTTGGATAAAAAGTACG                                                                                                                                                                                                |
| pRTL2/p36-myc TMD1ΔTMD2                  | Fp654<br>Rp653                       | GGCATGCTCATTTGGCCTGGCGCGGTGACGCACTTGTCTTATTGTT<br>GCTGGCATTGCTACGCTA<br>CGCGTAGCGTACGCAATGCCAGCACAAATAGGAACAAGTGTGACGCG<br>GCCCGCAGGCAATGAGCATGCC                                                                                                                                     |
| pRTL2/p36-myc TMD1ΔTMD2- <i>SalI</i>     | Fp576                                | CGTACTTTTATCCACGTGTGACATGAGTGCCTGGCATGC                                                                                                                                                                                                                                               |

|                                                                                      |                                      |                                                                                                                                                                                              |
|--------------------------------------------------------------------------------------|--------------------------------------|----------------------------------------------------------------------------------------------------------------------------------------------------------------------------------------------|
|                                                                                      | Rp575                                | GCATGCCACGCGCACTCATGTGCGACACGTGGATAAAAGTACG                                                                                                                                                  |
| pRTL2/p36-myc TMD1⇌TMD2                                                              | Fp682<br>Rp680<br>Fp681<br>Rp679     | TCGACATGAGTGGCGTTACCGCACTGCCGTGGGGTTGG<br>ATGGCCAACCCACGGCAGTGGCGTAACGCGCACTCATG<br>CCATCATACCTGGTATCCCAGCGATTGTGGCAAACACACTCC<br>CTAGGGAGTGTGTTGCCACAATCGCCGGATACCAGGTATG                   |
| pRTL2/p36-myc TMD1ΔsynTMD                                                            | Fp1670<br>Rp1672                     | CGCCTGGCCTTAGTGTGCTGCACTAGTTTTGGCGTGGTCTTAGCTCTCGTACTAA<br>CGCGTTAGTACGAGAGCTAAGACCAGCGCCAAAACTAGTGGCAGCACTAAGGCCAGCGC                                                                       |
| pRTL2/p36-myc TMD2ΔsynTMD                                                            | Fp1674<br>Rp1675                     | TCGACATGAGTGGCGTGGCATGTGCGCCTTAGTGTGCGCACTAGTTTTG<br>GCGTGGTCTTAGCTCTCGTACTAGCCTTGGTGTGGCAC<br>CTAGGTGCCAGCACCAGGCTAGTACGAGAGCTAAGACCAGCGCCAAAAC<br>TAGTGGCAGCACTAAGGCCAGCATGCCACGCGCACTCATG |
| pRTL2/p36-myc TMD1ΔCb5TMD                                                            | Fp1977<br>Rp1978                     | CGTGCAGTTCCTGTAGCCATTGTTGGTATATCTGTGGTTGGCTTCTTATACC<br>TAA<br>CGCGTTAGGTATAAGAAGCCACAACACAGATATACCAACAATGGCTACAG<br>GAACTGCACG                                                              |
| pRTL2/p36-myc TMD2ΔCb5TMD                                                            | Fp1979<br>Rp1980                     | TCGACATGAGTGGCGTGGAGCAGTTCCTGTAGCCATTGTTGGTATATCTG<br>TGGTGTGGCTTCTTATACCTAC<br>CTAGGTAGGTATAAGAAGCCACAACACAGATATACCAACAATGGCTACA<br>GGAATGCTCCACGCGCACTCATG                                 |
| pRTL2/myc-Cb5Δp36TMD1                                                                | Fp1960<br>Rp1961                     | CTAGCACTGGCGTGGGTTGGCCATCATACCTGGTATCCCAGCGATTGTTGG<br>CAAACACACGTAAGAAGTAGT<br>CTAGACTACTTCTTACGTGTGTTTGGCACAATCGCCGGGATACCAGGTATG<br>ATGGCCAACCCACGGCAGTG                                  |
| pRTL2/myc-Cb5Δp36TMD2                                                                | Fp1962<br>Rp1963                     | CTAGCATGTCTATGGCCTGGCGGGCTGCAGCACTTGTTCCTATTGTTGG<br>CTGGCATTGGCTACGCTACCCTACGTAAGAAGTAGT<br>CTAGACTACTTCTTACGTAGGTAGCGTACGCAATGCCAGCACAATAGGA<br>ACAAGTGTGCAGCCGCGCCAGGCCAATGAGCATG         |
| pRTL2/p36-mycΔ131-157                                                                | Fp1966<br>Rp1967                     | GGTACATGTGAGGTGGCAGGGCGTGTAGACATGAGTGGCGG<br>CGCGCACTCATGTCTACACGCCCTGCCACCTCACATGTACC                                                                                                       |
| pRTL2/p36-myc K <sub>93</sub> K <sub>94</sub> R <sub>98</sub> R <sub>101</sub> ΔG    | Fp412<br>Rp410                       | GCTAAATATGATGGTTGGCTGGAGGGGTGTGGTGGTATTACGGCAC<br>TGCCGTGGGGTTGGCC<br>GGCCAACCCACGGCAGTGGCGTAATCACCAGCCACACCCCTCCAGCCA<br>ACCAATCATATTTAGC                                                   |
| pRTL2/p36-myc R <sub>144</sub> K <sub>151</sub> ΔG                                   | Fp2048<br>Rp2049                     | CTGAACATGCTTTCTGGATTACACATGCGAGTGTAGGAGTACCGTACTTTTATCC<br>GGATAAAAGTACGGTACTCTTACACTCGCATGTGTGAATCCAGAAAGCATGTTCCAG                                                                         |
| pRTL2/p36-myc K <sub>134</sub> K <sub>137</sub> R <sub>144</sub> K <sub>151</sub> ΔG | Fp2098<br>Rp2099                     | GAGGTGGCAGGGGTGCTGTAGGGCTGCCGGGGCGCTGAACATGCTTTCTGGA<br>TCCAGAAAGCATGTTACAGCCCGGGCAGCCCTACAGAACCCCTGCCACCTC                                                                                  |
| pSAT4/N Venus C1                                                                     | Fp1905<br>Rp1922<br>Fp1941<br>Rp1946 | CCGGCCATGGGCGCGTGCAGCTCGCCGACCAC<br>GAGCTGCACGCGCCAGATCTGTCTCGATGTTGTG<br>GATCTGAACAAAAGTTGATTTCTGAAGAAGATCTGTCTCGAGCT<br>ACTTGTTTTCAACTAAAGACTTCTTCTAGACAGAGC                               |
| pSAT4/N Venus N1                                                                     | Fp1909<br>Rp1924<br>Fp1943<br>Rp1944 | CCGGCCGATCCTGATGGTGAAGGCGAGGAGCTG<br>GGCGAGTGCACGCGCCTTAGATTAGTCTTCCGATGTTGTGGCG<br>GGGCCGGGGAACAAAAGTTGATTTCTGAAGAAGATCTGGG<br>CGCCCGGGCCCTTGTTTTCAACTAAAGACTTCTTCTAGACCCCTAG               |
| pSAT4/C Venus C1                                                                     | Fp1907<br>Rp1908<br>Fp1942<br>Rp1947 | CCGGCATGGGCGGCTGCAGCTCGCCGACCAC<br>CCGGCAGATCTCTTGTACAGCTCGTCCATGCCGAG<br>GATCTTACCATACGACGTGCCAGACTACGCCCTCTCGAGCT<br>AATGGGTATGCTGCACGGTCTGATGCCGAGAGC                                     |
| pSAT4/C Venus N1                                                                     | Fp1911<br>Rp1912<br>Fp1945<br>Rp1948 | CCGGCCGATCCTGGGCGGCTGCAGCTCGCCGACCAC<br>CCGGCCTTAGATTACTTGTACAGCTCGTCCATGCCGAG<br>CGCCCGGGCCATGGGTATGCTGCACGGTCTGATCGGGCCCTAG<br>GGGCCGGGTACCATACGACGTGCCAGACTACGCCGG                        |
| pSAT4/N Venus-Tom20                                                                  | Fp2088<br>Rp2089                     | CCGGCGGAATTTCTATGGATACGGAAACTGAGTTTCGATAG<br>CCGGCGCCGGGATTAACGAGGAGGAGACAGGCAC                                                                                                              |
| pSAT4/N Venus-Tom20mut                                                               | Fp2274<br>Rp2275                     | CGAGCTCAAGCTTCGAATTTGGCTTAGGCTCACAACCAATG<br>CATTGGTTGTGAGCCTAAGCCAGAATTCGAAGCTTGTAGCTCG                                                                                                     |
| pSAT4/N Venus-Tom22                                                                  | Fp2090<br>Rp2091                     | CCGGCGGAATTTCTATGGCGCCTAAGAAAATCGGAGCC<br>CCGGCGCCGGGATTAGAGCATCGCACCGACCGGTGG                                                                                                               |

|                               |                  |                                                                                                                                  |
|-------------------------------|------------------|----------------------------------------------------------------------------------------------------------------------------------|
| pSAT4/N Venus-Tom40           | Fp2086<br>Rp2087 | CCGGCGGAATTCATGGCGGATCTTTACCACCTCTTAC<br>CCGGCGCCCGGGATTAACCAACTGTTAATCCGAAACC                                                   |
| pSAT4/Tom40-N Venus           | Fp2086<br>Rp2087 | CCGGCGGAATTCATGGCGGATCTTTACCACCTCTTAC<br>CCGGCGCCCGGGATTAACCAACTGTTAATCCGAAACC                                                   |
| pCR2.1 TOPO/mtOM64            | Fp2096<br>Rp2097 | CCGGCGCTCGAGCATGTCGAATACGCTTTCTTTGATC<br>CCGGCGCCCGGTATGTGTTTTTCGGAGTCTCTTCTC                                                    |
| pSAT4/mtOM64mut-N Venus       | Fp2272<br>Rp2273 | CTCGATACAACCTCTCGATCCCGGGGAACAAAAGTTGATT<br>AATCAACTTTTGTTCCTCCGGGATCGAGAGTTGTATCGAG                                             |
| pSAT4/Tim14-N Venus           | Fp2129<br>Rp2284 | CCGGCGGAATTCATGGCGACACCATTATAGCGGGG<br>CCGGGCCCGGGAAAAGCGGATCCGCTGTTTTTAGTTTTGCC                                                 |
| pSAT4/p36-N Venus             | Fp2094<br>Rp2095 | CCGGCGGAATTCATGGAGGTTTGAAGGCTGAGCTAC<br>CCGGGCCCGGGTTGACACCGAGGATTCCTGGGAAC                                                      |
| pSAT4/p36-C Venus             | Fp2094<br>Rp2095 | CCGGCGGAATTCATGGAGGTTTGAAGGCTGAGCTAC<br>CCGGGCCCGGGTTGACACCGAGGATTCCTGGGAAC                                                      |
| pSAT4/p33-C Venus             | Fp2176<br>Rp2095 | GCTTCGAATTCATGGAGACCATCAAGAGAATGATTTGGCCTAAG<br>CCGGGCCCGGGTTGACACCGAGGATTCCTGGGAAC                                              |
| pSAT4/ $\beta$ ATPase-C Venus | Fp2092<br>Rp2093 | GAATTCATGGCTTCTCGGAGGCAACAAGCCTTCAACAACGTCAATCGGC<br>TCAACGTGG<br>CCACGTTGAGCCGATTGACGTTGTTGAGAGGTTGTTGCCTCCGAGAA<br>GCCATGAATTC |
| pSAT4/porin-C Venus           | Fp2130<br>Rp2131 | CCGGCGGAATTCATGGTGAAGGTCCCGGTCTCTAC<br>CCGGGCCCGGGAGGCTTGAGTGCAGAGCCAATCC                                                        |
| pSAT4/ C Venus-Cb5            | Fp1325<br>Rp1324 | CGGGCCATATGATGCCACTCTCACCAACTATTACAATG<br>GGCGCCGATCCTCTAGACTACTTCTTACGTAGGTATAAGAA                                              |
| pUC18/ $\beta$ ATPase-GFP     | FpRD1<br>RpRD2   | GGGGGGCTAGCATGGCTTCTCGGAGGCTTCTCGCC<br>GGGGGGCTAGCCCCGATCGAACCAGCGCCGG                                                           |
